# Supplementary material
Source: HighWire-hosted journal article supplement (https://bmjopenquality.bmj.com/highwire/filestream/136150/field_highwire_adjunct_files/1/ds2014.docx)

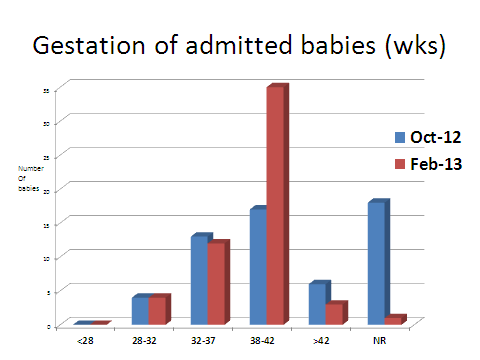

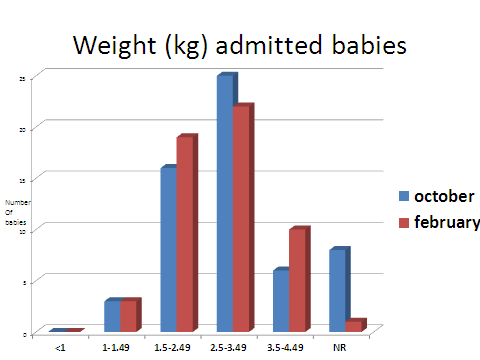

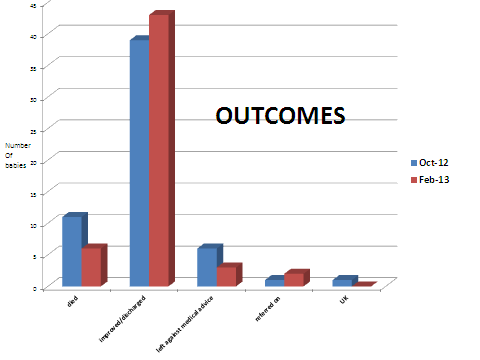

Supplement: ds2014.docx [file ds2014.docx]
